# Supplementary material for: Molecular Dynamics Simulation on the Effect of Self-Resistance Electric Heating on Carbon Fiber Surface Chemical Properties and Fiber/PP Interfacial Behavior
Source: MDPI journal article supplement (doi:10.3390/polym14051043), 2022-03-05
Supplement: s1 [file s1]

## Supporting Information

### **Molecular Dynamics Simulation on the effect of self-resistance electric heating on carbon fiber surface chemical properties and fiber/PP interfacial behavior**

Qingzhu He <sup>1</sup>, Jiaqing Liu <sup>1</sup>, Muhan Zhang <sup>1</sup>, Zhanyu Zhai <sup>1,2,\*</sup>, Bingyan Jiang <sup>1,2</sup>

<sup>1</sup> College of Mechanical and Electrical Engineering, Central South University, Changsha, 410083, China;

<sup>2</sup> State Key Laboratory of High Performance and Complex Manufacturing, Central South University, Changsha, 410083, China;

\* Correspondence: zhanyuzhai@csu.edu.cn

Figure S1 shows the temperature field distribution of carbon fiber fabric under SRE heating with the current intensity of 12 A, 16 A, 20 A and 24 A. As seen, the electric current of 12 A, 16 A, 20 A and 24 A at steady stage corresponds the surface temperature of carbon fiber fabrics of  $158\pm2.9^{\circ}\text{C}$ ,  $212\pm3.2^{\circ}\text{C}$ ,  $270\pm4.9^{\circ}\text{C}$  and  $332\pm5.4^{\circ}\text{C}$  respectively, which has been added in the revised manuscript.

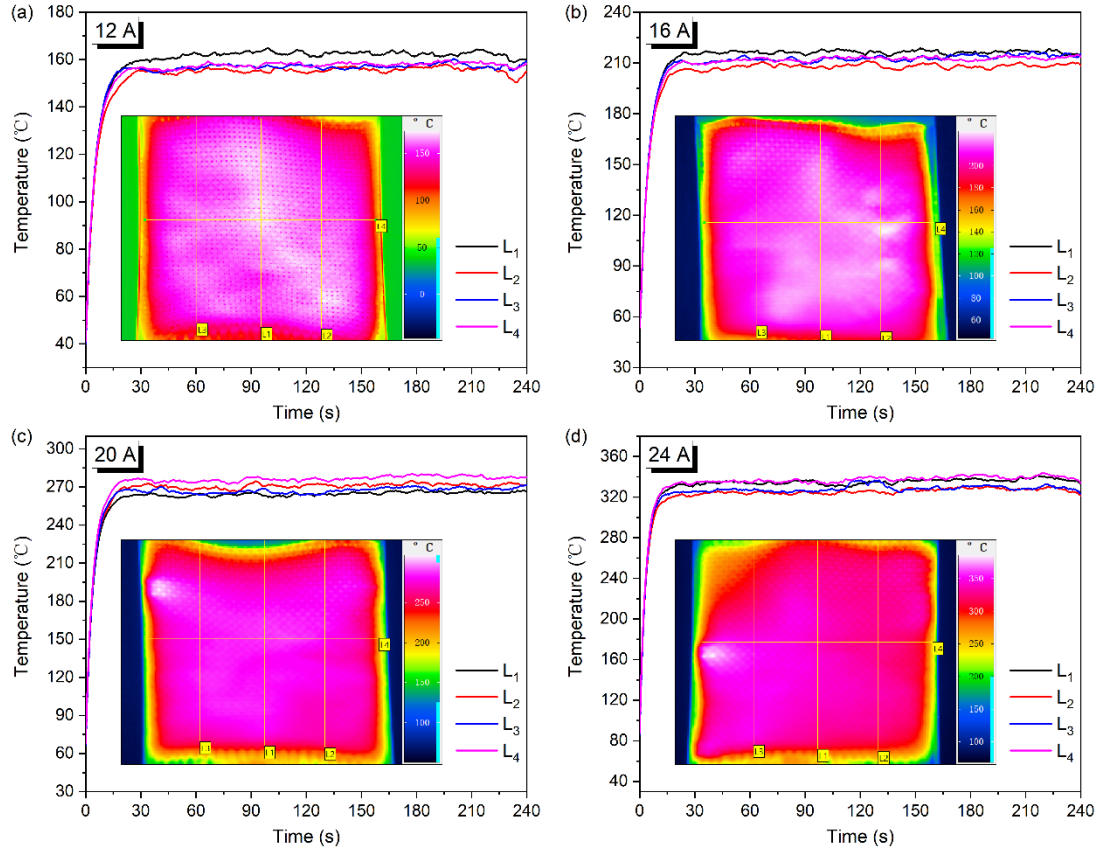

Figure S1. Temperature field distribution of carbon fiber fabric under SRE heating with different current intensity.
